# Supplementary material for: Is antibiotic prophylaxis generally safe and effective in surgical and nonsurgical scenarios? Evidence from an umbrella review of randomized controlled trials
Source: PubMed Central journal article supplement — Int J Surg. 2023 Nov 27;110(2):1224–33. doi: 10.1097/JS9.0000000000000923 (PMC10871558; doi:10.1097/js9.0000000000000923), 2023-11-27
Supplement: js9-110-1224-s011.pdf [file js9-110-1224-s011.pdf]

| Clinical scenarios                                         | Outcomes                                             | No. of RCTs | Random Effects (95% CI) | Baseline risk | Absolute risk difference                    | p value  | I <sup>2</sup> , Q test p value | t <sub>2</sub> | 95% Prediction interval | Egger's p value | Begg's p value | Harbord's p value | LH/SS/ESB | GRADE    | AMSTAR2        | Evidence Classification |
|------------------------------------------------------------|------------------------------------------------------|-------------|-------------------------|---------------|---------------------------------------------|----------|---------------------------------|----------------|-------------------------|-----------------|----------------|-------------------|-----------|----------|----------------|-------------------------|
| <b>Surgery</b>                                             |                                                      |             |                         |               |                                             |          |                                 |                |                         |                 |                |                   |           |          |                |                         |
| <b>Clean</b>                                               |                                                      |             |                         |               |                                             |          |                                 |                |                         |                 |                |                   |           |          |                |                         |
| Total joint arthroplasty                                   | Surgical site infections                             | 3           | 0.24 [0.16,0.37]        | 60 per 1000   | 46 fewer per 1000 (38 fewer to 50 fewer)    | 4.52E-11 | 0%, 0.65                        | 0              | 0.096 to 0.61           | 0.27            | 0.12           | 0.43              | None      | Moderate | Critically Low | Class I                 |
| Tube thoracostomy for traumatic chest injuries             | Overall infectious complications                     | 10          | 0.24 [0.12,0.49]        | NA            | NA                                          | 7.55E-05 | 30%, 1.71                       | 0.36           | 0.05 to 1.21            | 0.27            | 0.089          | NA                | None      | Low      | Critically Low | Class III               |
| Tube thoracostomy for traumatic chest injuries             | Empyema                                              | 11          | 0.31 [0.17,0.59]        | NA            | NA                                          | 0.0004   | 0%, 0.94                        | 0              | 0.15 to 0.66            | 0.56            | 0.016          | NA                | None      | Low      | Critically Low | Class I                 |
| Closed fracture surgery                                    | Deep surgical site infections (multiple dose)        | 10          | 0.39 [0.21,0.70]        | 50 per 1000   | 30 fewer per 1000 (15 fewer to 39 fewer)    | 0.002    | 0%, 0.89                        | 0              | 0.19 to 0.78            | 0.007           | 0.73           | 0.006             | None      | Very low | High           | Class I                 |
| Closed fracture surgery                                    | Deep surgical site infections (single dose)          | 7           | 0.41 [0.24,0.69]        | 27 per 1000   | 16 fewer per 1000 (8 fewer to 21 fewer)     | 0.00075  | 0%, 0.59                        | 0              | 0.21 to 0.81            | 0.21            | 0.62           | 0.74              | None      | Very low | High           | Class I                 |
| Plastic and reconstructive surgery (Clean)                 | Surgical site infections                             | 4           | 0.41 [0.25,0.66]        | 170 per 1000  | 100 fewer per 1000 (58 fewer to 130 fewer)  | 0.00031  | 0%, 0.42                        | 0              | 0.14 to 1.19            | 0.24            | 0.17           | 0.11              | None      | Moderate | Low            | Class II                |
| Craniotomy surgery                                         | Meningitis                                           | 7           | 0.42 [0.21,0.86]        | 26 per 1000   | 15 fewer per 1000 (4 fewer to 21 fewer)     | 0.017    | 0%, 0.57                        | 0              | 0.17 to 1.07            | 0.26            | 0.65           | 0.69              | None      | Very low | Critically Low | Class IV                |
| Closed fracture surgery                                    | Superficial surgical site infections (multiple dose) | 7           | 0.43 [0.21, 0.89]       | 76 per 1000   | 43 fewer per 1000 (8 fewer to 60 fewer)     | 0.02     | 23%, 0.26                       | 0.21           | 0.095 to 1.95           | 0.06            | 0.051          | 0.29              | None      | Very low | High           | Class IV                |
| Mohs Surgery                                               | Surgical site infections                             | 5           | 0.49 [0.19,1.24]        | 69 per 1000   | 35 fewer per 1000 (56 fewer to 17 more)     | 0.13     | 74%, 0.004                      | 0.77           | 0.02 to 11.72           | 0.32            | 0.62           | 0.37              | LH        | Very low | Critically Low | Class V                 |
| Breast reduction surgery                                   | Surgical site infections                             | 5           | 0.50 [0.28,0.89]        | 210 per 1000  | 110 fewer per 1000 (23 fewer to 150 fewer)  | 0.02     | 27%, 0.24                       | 0.12           | 0.11 to 2.17            | 0.034           | 0.33           | 0.07              | SSE       | Low      | Critically Low | Class IV                |
| Hepatectomy                                                | Surgical site infections                             | 4           | 1.19 [0.79,1.80]        | 70 per 1000   | 13 more per 1000 (15 fewer to 56 more)      | 0.41     | 0%, 0.28                        | 0              | 0.48 to 2.94            | 0.83            | 0.5            | 0.79              | None      | Low      | Critically Low | Class V                 |
| Hernioplasty surgery                                       | Postoperative wound infection                        | 22          | 0.61 [0.48,0.78]        | 63 per 1000   | 25 fewer per 1000 (14 fewer to 33 fewer)    | 8.80E-5  | 0%, 0.87                        | 0              | 0.47 to 0.79            | 0.059           | 0.11           | 0.42              | SSE       | Moderate | High           | Class III               |
| Shunt surgery in children with hydrocephalus               | Infections                                           | 7           | 0.62 [0.40,0.96]        | 140 per 1000  | 53 fewer per 1000 (6 fewer to 84 fewer)     | 0.032    | 0%, 0.98                        | 0              | 0.35 to 1.10            | 0.61            | 0.65           | 0.5               | None      | None     | Critically Low | Class IV                |
| Thyroid surgery                                            | Surgical site infections                             | 3           | 0.67 [0.17,2.58]        | 7 per 1000    | 2 fewer per 1000 (6 fewer to 12 more)       | 0.56     | 0%, 0.54                        | 0              | NA                      | 0.43            | 0.12           | 0.49              | None      | Very low | Low            | Class V                 |
| Breast cancer surgery                                      | Surgical site infections                             | 10          | 0.69 [0.54,0.88]        | 110 per 1000  | 34 fewer per 1000 (13 fewer to 51 fewer)    | 0.0027   | 0%, 0.61                        | 0              | 0.52 to 0.92            | 0.21            | 0.30           | 0.20              | None      | Moderate | High           | Class I                 |
| Closed fracture surgery                                    | Superficial surgical site infections (single dose)   | 7           | 0.71 [0.51,0.98]        | 51 per 1000   | 15 fewer per 1000 (1 fewer to 25 fewer)     | 0.04     | 0%, 0.75                        | 0              | 0.47 to 1.08            | 0.65            | 0.88           | 0.76              | None      | Very low | High           | Class IV                |
| Herniorrhaphy surgery                                      | Postoperative wound infection                        | 5           | 0.86 [0.56,1.33]        | 45 per 1000   | 6 fewer per 1000 (20 fewer to 15 more)      | 0.48     | 0%, 0.44                        | 0              | 0.39 to 1.80            | 0.085           | 0.014          | 0.24              | SSE       | Very low | High           | Class V                 |
| Simple hand surgery                                        | Wound infection                                      | 10          | 0.92 [0.65,1.30]        | 55 per 1000   | 4 fewer per 1000 (19 fewer to 17 more)      | 0.64     | 0%, 0.81                        | 0              | 0.61 to 1.38            | 0.64            | 0.42           | 0.51              | None      | Low      | Critically Low | Class V                 |
| <b>Clean-contaminated</b>                                  |                                                      |             |                         |               |                                             |          |                                 |                |                         |                 |                |                   |           |          |                |                         |
| Transurethral resection of the prostate                    | Septicemia                                           | 8           | 0.23 [0.09,0.57]        | 13 per 1000   | 10 fewer per 1000 (6 fewer to 12 fewer)     | 0.0014   | 0%, 0.88                        | 0              | 0.08 to 0.71            | 0.24            | 1.0            | 0.44              | None      | Low      | Low            | Class I                 |
| Renal transplant recipients                                | Bacteremia                                           | 2           | 0.13 [0.02,0.70]        | 120 per 1000  | 104 fewer per 1000 (36 fewer to 120 fewer)  | 0.02     | 0%, 0.75                        | 0              | NA                      | NA              | NA             | NA                | None      | Very low | Critically Low | Class IV                |
| Elective vaginal hysterectomy                              | Postoperative infections                             | 4           | 0.20 [0.06,0.62]        | 630 per 1000  | 500 fewer per 1000 (240 fewer to 590 fewer) | 0.0052   | 82%, 0.00092                    | 1.046          | 0.0013 to 31.09         | 0.097           | 0.50           | 0.34              | SSE, LH   | Low      | High           | Class II                |
| Elective vaginal hysterectomy                              | Pelvic infection                                     | 11          | 0.24 [0.13,0.46]        | 160 per 1000  | 120 fewer per 1000 (90 fewer to 140 fewer)  | 1.30E-05 | 45%, 0.050                      | 0.41           | 0.048 to 1.23           | 0.0038          | 0.70           | 0.049             | None      | Moderate | High           | Class II                |
| Uteroscopic lithotripsy                                    | Postoperative bacteriuria                            | 3           | 0.27 [0.11,0.63]        | 150 per 1000  | 110 fewer per 1000 (60 fewer to 130 fewer)  | 0.0027   | 0%, 0.69                        | 0              | 0.0010 to 69.11         | 0.095           | 0.12           | 0.026             | SSE       | Moderate | Critically Low | Class III               |
| Uteroscopic lithotripsy                                    | Postoperative febrile UTIs                           | 3           | 0.29 [0.07,1.23]        | 30 per 1000   | 20 fewer per 1000 (30 fewer to 7 more)      | 0.093    | 0%, 0.79                        | 0              | NA                      | NA              | NA             | NA                | None      | Low      | Critically Low | Class V                 |
| Dental implants surgery                                    | Early implant failure                                | 8           | 0.32 [0.20,0.51]        | 50 per 1000   | 34 fewer per 1000 (29 fewer to 38 fewer)    | 1.50E-06 | 0%, 0.55                        | 0              | 0.18 to 0.57            | 0.23            | 0.047          | 0.22              | None      | Low      | Critically Low | Class I                 |
| Transurethral resection of the prostate                    | Postoperative bacteriuria                            | 32          | 0.33 [0.25,0.43]        | 85 per 1000   | 57 fewer per 1000 (48 fewer to 64 fewer)    | 9.94E-17 | 40%, 0.012                      | 0.17           | 0.14 to 0.80            | 0.002           | 0.11           | 0.043             | SSE       | Low      | Low            | Class II                |
| Tooth extraction                                           | Post-surgical infectious complications               | 12          | 0.37 [0.22,0.62]        | 91 per 1000   | 57 fewer per 1000 (35 fewer to 71 fewer)    | 0.00015  | 8%, 0.36                        | 0.08           | 0.16 to 0.86            | 0.77            | 0.68           | 0.53              | None      | Low      | High           | Class I                 |
| Cesarean section                                           | Serious infectious morbidity                         | 32          | 0.37 [0.23,0.59]        | 32 per 1000   | 20 fewer per 1000 (13 fewer to 25 fewer)    | 3.76E-05 | 0%, 0.99                        | 0              | 0.22 to 0.60            | 0.34            | 0.27           | 0.40              | None      | Moderate | High           | Class I                 |
| Percutaneous nephrolithotomy                               | Postoperative sepsis                                 | 4           | 0.39 [0.27,0.58]        | 370 per 1000  | 230 fewer per 1000 (160 fewer to 270 fewer) | 1.52E-06 | 0%, 0.56                        | 0              | 0.17 to 0.91            | 0.12            | 0.50           | 0.16              | None      | Moderate | Critically Low | Class I                 |
| Cesarean section                                           | Endometritis                                         | 83          | 0.39 [0.35,0.44]        | 160 per 1000  | 98 fewer per 1000 (90 fewer to 100 fewer)   | 2.74E-55 | 8%, 0.27                        | 0.02           | 0.29 to 0.54            | 0.0035          | 0.03           | 0.08              | None      | Moderate | High           | Class I                 |
| Cesarean section                                           | Wound infection                                      | 82          | 0.41 [0.35,0.49]        | 95 per 1000   | 56 fewer per 1000 (48 fewer to 62 fewer)    | 2.25E-22 | 19%, 0.076                      | 0.11           | 0.21 to 0.81            | 0.00016         | 0.08           | 0.01              | None      | Moderate | High           | Class I                 |
| Uteroscopic lithotripsy                                    | Postoperative pyuria                                 | 2           | 0.42 [0.25,0.69]        | 570 per 1000  | 330 fewer per 1000 (180 fewer to 430 fewer) | 0.00076  | 0%, 0.33                        | 0              | NA                      | NA              | NA             | NA                | None      | Moderate | Critically Low | Class II                |
| Elective vaginal hysterectomy                              | Postoperative fever                                  | 9           | 0.43 [0.29,0.62]        | 280 per 1000  | 160 fewer per 1000 (110 fewer to 200 fewer) | 9.60E-06 | 45%, 0.068                      | 0.13           | 0.16 to 1.12            | 0.11            | 0.061          | 0.24              | None      | Moderate | High           | Class II                |
| Elective abdominal hysterectomy                            | UTIs                                                 | 12          | 0.43 [0.30,0.61]        | 130 per 1000  | 70 fewer per 1000 (50 fewer to 90 fewer)    | 3.80E-06 | 26%, 0.19                       | 0.091          | 0.20 to 0.94            | 0.24            | 0.27           | 0.52              | ESB       | Moderate | High           | Class II                |
| Renal transplant recipients                                | Bacteriuria                                          | 3           | 0.43 [0.32,0.58]        | 650 per 1000  | 370 fewer per 1000 (270 fewer to 440 fewer) | 4.21E-08 | 0%, 0.56                        | 0              | 0.06 to 3.06            | 0.16            | 0.12           | 0.19              | None      | Moderate | Critically Low | Class II                |
| Percutaneous endoscopic gastrostomy                        | Peristomal site infection                            | 11          | 0.43 [0.32,0.58]        | 250 per 1000  | 140 fewer per 1000 (110 fewer to 170 fewer) | 4.21E-08 | 0%, 0.56                        | 0              | 0.06 to 3.06            | 0.16            | 0.94           | 0.83              | None      | Moderate | High           | Class I                 |
| Rhinoplasty                                                | Infectious complications                             | 3           | 0.44 [0.18,1.04]        | 100 per 1000  | 60 fewer per 1000 (80 fewer to 4 more)      | 0.06     | 0%, 0.43                        | 0              | 0.0015 to 122.20        | 0.53            | 0.60           | NA                | None      | Very low | Low            | Class V                 |
| Cesarean section                                           | Febrile morbidity                                    | 56          | 0.45 [0.40,0.51]        | 270 per 1000  | 150 fewer per 1000 (130 fewer to 160 fewer) | 8.21E-38 | 38%, 0.0030                     | 0.069          | 0.26 to 0.77            | 0.011           | 0.11           | 0.19              | SSE       | Moderate | High           | Class III               |
| Stented distal hypoplasias repair                          | Overall complications                                | 3           | 0.50 [0.21,1.19]        | 80 per 1000   | 40 fewer per 1000 (60 fewer to 20 more)     | 0.12     | 50%, 0.14                       | 0.29           | NA                      | 0.22            | 0.6            | 0.13              | LH        | Very low | Critically Low | Class V                 |
| Elective abdominal hysterectomy                            | Abdominal wound infection                            | 11          | 0.53 [0.35,0.80]        | 60 per 1000   | 30 fewer per 1000 (10 fewer to 40 fewer)    | 0.00023  | 6%, 0.39                        | 0.032          | 0.28 to 0.98            | 0.94            | 0.70           | 0.69              | None      | Moderate | High           | Class I                 |
| Elective abdominal hysterectomy                            | Pelvic infection                                     | 11          | 0.54 [0.36,0.81]        | 100 per 1000  | 50 fewer per 1000 (60 fewer to 20 fewer)    | 0.0028   | 9%, 0.36                        | 0.042          | 0.28 to 1.04            | 0.038           | 0.14           | 0.068             | None      | Moderate | High           | Class III               |
| Elective abdominal hysterectomy                            | Postoperative fever                                  | 11          | 0.55 [0.42,0.72]        | 270 per 1000  | 120 fewer per 1000 (80 fewer to 160 fewer)  | 1.10E-05 | 54%, 0.016                      | 0.098          | 0.25 to 1.19            | 0.0004          | 0.0008         | 0.0008            | LH, SSE   | Moderate | High           | Class III               |
| Elective vaginal hysterectomy                              | UTIs                                                 | 8           | 0.56 [0.35,0.89]        | 160 per 1000  | 70 fewer per 1000 (20 fewer to 100 fewer)   | 0.014    | 44%, 0.086                      | 0.17           | 0.17 to 1.79            | 0.96            | 1.0            | 0.95              | None      | Moderate | High           | Class IV                |
| Plastic and reconstructive surgery (Clean-contaminated)    | Surgical site infections                             | 5           | 0.61 [0.37,0.99]        | 120 per 1000  | 47 fewer per 1000 (11 fewer to 76 fewer)    | 0.045    | 17%, 0.31                       | 0.062          | 0.20 to 1.86            | 0.057           | 0.17           | 0.21              | SSE       | Moderate | Low            | Class III               |
| Surgery for incomplete abortion                            | Genital tract infection                              | 24          | 0.63 [0.51,0.77]        | NA            | NA                                          | 6.80E-06 | 50%, 0.003                      | 0.1            | 0.31 to 1.27            | 0.0003          | 0.0068         | NA                | LH, SSE   | Moderate | High           | Class III               |
| Elective laparoscopic cholecystectomy                      | Surgical site infections                             | 21          | 0.67 [0.50,0.90]        | 47 per 1000   | 16 fewer per 1000 (5 fewer to 24 fewer)     | 0.0076   | 0%, 0.74                        | 0              | 0.49 to 0.91            | 0.93            | 0.81           | 0.5               | None      | High     | Critically Low | Class I                 |
| Post-midurethral sling placement                           | UTIs                                                 | 3           | 0.72 [0.29,1.78]        | NA            | NA                                          | 0.48     | 70%, 0.036                      | 0.44           | NA                      | 0.98            | 0.60           | NA                | LH        | Very low | Critically Low | Class V                 |
| Endoscopic sinus surgery                                   | Infections                                           | 3           | 0.76 [0.54,1.09]        | NA            | NA                                          | 0.14     | 0%, 0.79                        | 0              | 0.08 to 7.56            | 0.27            | 0.60           | NA                | None      | Very low | Critically Low | Class V                 |
| Uteroscopic lithotripsy                                    | Postoperative fever                                  | 2           | 0.82 [0.41,1.67]        | 90 per 1000   | 20 fewer per 1000 (50 fewer to 60 more)     | 0.59     | 0%, 0.59                        | 0              | NA                      | NA              | NA             | NA                | None      | None     | Critically Low | Class V                 |
| Kidney transplant recipients with asymptomatic bacteriuria | Symptomatic UTIs                                     | 2           | 0.86 [0.51,1.45]        | 250 per 1000  | 40 fewer per 1000 (120 fewer to 110 more)   | 0.566    | 0%, 0.3438                      | 0              | NA                      | NA              | NA             | NA                | None      | Low      | Low            | Class V                 |
| Transurethral resection of bladder tumors                  | Postoperative UTIs                                   | 4           | 1.12 [0.22,5.70]        | 26 per 1000   | 3 more per 1000 (20 fewer to 120 more)      | 0.89     | 30%, 0.23                       | 0.85           | 0.005 to 233            | 0.5             | 0.60           | 0.90              | None      | Very low | High           | Class V                 |
| <b>Contaminated</b>                                        |                                                      |             |                         |               |                                             |          |                                 |                |                         |                 |                |                   |           |          |                |                         |
| Endoscopic resection for colorectal lesions                | Postoperative adverse events                         | 3           | 0.16 [0.08,0.31]        | 180 per 1000  | 150 fewer per 1000 (120 fewer to 170 fewer) | 3.13E-08 | 0%, 0.91                        | 0              | 0.002 to 10.66          | 0.00012         | 0.12           | 0.27              | SSE       | Moderate | Low            | Class II                |
| Colorectal surgery                                         | Surgical wound infection                             | 30          | 0.35 [0.29,0.41]        | 390 per 1000  | 250 fewer per 1000 (230 fewer to 270 fewer) | 4.84E-31 | 8%, 0.34                        | 0.02           | 0.25 to 0.49            | 2.47E-06        | NA             | NA                | SSE       | Low      | High           | Class III               |
| Transrectal prostate biopsy                                | Pooled infectious complications                      | 12          | 0.58 [0.40,0.85]        | 150 per 1000  | 63 fewer per 1000 (23 fewer to 90 fewer)    | 0.0055   | 14%, 0.31                       | 0.062          | 0.29 to 1.18            | 0.014           | 0.028          | 0.032             | None      | Low      | High           | Class III               |
| <b>Dirty or infected</b>                                   |                                                      |             |                         |               |                                             |          |                                 |                |                         |                 |                |                   |           |          |                |                         |
| Incision and drainage of anorectal abscesses               | Anal fistulas                                        | 2           | 0.89 [0.26,3.03]        | 270 per 1000  | 30 fewer per 1000 (200 fewer to 550 more)   | 0.85     | 92%, 0.00035                    | 0.73           | NA                      | NA              | NA             | NA                | LH        | Very low | Critically Low | Class V                 |
| <b>Undefined</b>                                           |                                                      |             |                         |               |                                             |          |                                 |                |                         |                 |                |                   |           |          |                |                         |
| Any surgical procedures                                    | Surgical site infections                             | 52          | 0.89 [0.79,1.00]        | 63 per 1000   | 7 fewer per 1000 (0 fewer to 13 fewer)      | 0.05     | 0%, 0.50                        | 0              | 0.79 to 1.00            | 0.31            | 0.45           | 0.54              | None      | Moderate | High           | Class V                 |
| <b>Non-surgical invasive procedures</b>                    |                                                      |             |                         |               |                                             |          |                                 |                |                         |                 |                |                   |           |          |                |                         |
| Shock wave lithotripsy in patients with sterile urine      | Fever                                                | 4           | 0.39 [0.07,2.20]        | 140 per 1000  | 85 fewer per 1000 (130 fewer to 170 more)   | 0.29     | 57%, 0.07                       | 1.72           | 0.00044 to 347.84       | 0.74            | 0.5            | 0.2               | None      | Very low | Critically Low | Class V                 |
| External ventricular drain (EVD) placement                 | Ventriculostomy-related infections                   | 3           | 0.43 [0.17,1.08]        | 190 per 1000  | 110 fewer per 1000 (160 fewer to 16 more)   | 0.07     | 0%, 0.71                        | 0              | 0.001 to 163            | 0.057           | 0.12           | 0.89              | None      | Very low | Low            | Class V                 |
| Endoscopic retrograde cholangiopancreatography (ERCP)      | Septicaemia                                          | 6           | 0.44 [0.18,1.07]        | 55 per 1000   | 30 fewer per 1000 (45 fewer to 4 more)      | 0.07     | 0%, 0.57                        | 0              | 0.12 to 1.57            | 0.52            | 0.17           | 0.9               | None      | Very low | High           | Class V                 |
| Adults undergoing cystoscopy                               | Symptomatic UTIs                                     | 11          | 0.48 [0.29,0.78]        | 40 per 1000   | 20 fewer per 1000 (                         |          |                                 |                |                         |                 |                |                   |           |          |                |                         |
