# Supplementary material for: Is antibiotic prophylaxis generally safe and effective in surgical and nonsurgical scenarios? Evidence from an umbrella review of randomized controlled trials
Source: PubMed Central journal article supplement — Int J Surg. 2023 Nov 27;110(2):1224–33. doi: 10.1097/JS9.0000000000000923 (PMC10871558; doi:10.1097/js9.0000000000000923), 2023-11-27
Supplement: js9-110-1224-s014.pdf [file js9-110-1224-s014.pdf]

Supplementary Figure 2

|                                                                | Benefits                                                                                                                           | Practice strategies                                                                                                                                                   | NNT             |
|----------------------------------------------------------------|------------------------------------------------------------------------------------------------------------------------------------|-----------------------------------------------------------------------------------------------------------------------------------------------------------------------|-----------------|
| <b>Surgery</b>                                                 |                                                                                                                                    |                                                                                                                                                                       |                 |
| <b>Clean</b>                                                   |                                                                                                                                    |                                                                                                                                                                       |                 |
| Total joint arthroplasty                                       | Surgical site infections                                                                                                           | A single preoperative dose is enough; Postoperative or 24-hour continued perioperative use is unnecessary                                                             | 24              |
| Closed fracture surgery                                        | Deep surgical site infections (single dose and multiple dose), Superficial surgical site infections(single dose and multiple dose) | Single dose intravenous prophylaxis is not inferior to multiple dose regimens; Appears to be cost-effective                                                           | 114, 36, 66, 23 |
| Breast cancer surgery                                          | Surgical site infections                                                                                                           | Single dose of preoperative prophylactic antibiotics is enough                                                                                                        | 29              |
| Tube thoracostomy for traumatic chest injuries                 | Empyema, Overall infectious complications                                                                                          | Especially beneficial for penetrating injuries                                                                                                                        | 22              |
| Craniotomy surgery                                             | Meningitis                                                                                                                         | Cefazolin is optimum; Clindamycin and vancomycin are alternative agents when $\beta$ -lactam allergy occurs                                                           | 61              |
| Breast reduction surgery                                       | Surgical site infections                                                                                                           | Single dose of preoperative use is effective; Postoperative use is unnecessary                                                                                        | 11              |
| Hernioplasty surgery                                           | Postoperative wound infection                                                                                                      | Showed benefit in high infection risk environment                                                                                                                     | 47              |
| Shunt surgery in children with hydrocephalus                   | Infections                                                                                                                         | Preoperative administration is recommended                                                                                                                            | 20              |
| Plastic and reconstructive surgery (Clean)                     | Surgical site infections                                                                                                           | Short-term antibiotic prophylaxes are preferred to longer-course regimen                                                                                              | 10              |
| Herniorrhaphy surgery                                          | -                                                                                                                                  | Insufficient evidence to support                                                                                                                                      | -               |
| Mohs Surgery                                                   | -                                                                                                                                  | Oral administration is not recommended, while intra-incisional prophylaxis may be effective                                                                           | -               |
| Simple hand surgery                                            | -                                                                                                                                  | Insufficient evidence to support                                                                                                                                      | -               |
| Thyroid surgery                                                | -                                                                                                                                  | Preoperative patient preparation and the observance of the rules of asepsis are preferred, rather than routine administration of antibiotic prophylaxis               | -               |
| Hepatectomy                                                    | -                                                                                                                                  | Insufficient evidence to support                                                                                                                                      | -               |
| <b>Clean-contaminated</b>                                      |                                                                                                                                    |                                                                                                                                                                       |                 |
| Cesarean section                                               | Wound infection, endometritis, febrile morbidity, serious infectious morbidity                                                     | Intravenously administered either at the start of the operative procedure or at or after clamping of the cord                                                         | 18, 10, 6, 58   |
| Percutaneous nephrolithotomy                                   | Postoperative sepsis                                                                                                               | Preoperative administration is necessary, especially for suspected infectious stones                                                                                  | 7               |
| Percutaneous endoscopic gastrostomy                            | Peristomal site infection                                                                                                          | Preoperative broad-spectrum antibiotics; Especially when using "pull" method for tube insertion                                                                       | 7               |
| Elective laparoscopic cholecystectomy                          | Surgical site infections                                                                                                           | 2-3 doses of preoperative antibiotic prophylaxis is optimum in low-risk patients                                                                                      | 62              |
| Dental implants surgery                                        | Early implant failure                                                                                                              | A single antibiotic prophylaxis dose in healthy patients                                                                                                              | 32              |
| Elective vaginal hysterectomy                                  | Urinary tract infections, Postoperative fever, Pelvic infection, Post operative infections                                         | A single dose of antibiotics intravenously within two hours of the surgical incision is the most common practice                                                      | 19, 8, 10, 2    |
| Elective abdominal hysterectomy                                | Urinary tract infections, Abdominal wound infection, Postoperative fever, Pelvic infection                                         | A single dose of antibiotics intravenously within two hours of the surgical incision is the most common practice                                                      | 13,31, 8, 10    |
| Transurethral resection of the prostate                        | Postoperative bacteriuria, Septicemia                                                                                              | Short course antibiotics may be more effective than single dose regimens. And quinolones, cephalosporins and co-trimoxazole are preferred options                     | 6, 30           |
| Renal transplant recipients                                    | Bacteriuria, Bacteremia                                                                                                            | No benefit for graft survival or mortality; Limited data and poor quality of evidence                                                                                 | 3, 9            |
| Tooth extraction                                               | Postsurgical infectious complications                                                                                              | Antibiotics given just before or just after surgery (or both)                                                                                                         | 18              |
| Surgery for incomplete abortion                                | Genital tract infection                                                                                                            | More effective for women in high-income countries                                                                                                                     | 52              |
| Plastic and reconstructive surgery (Clean-contaminated)        | Surgical site infections                                                                                                           | Short-term antibiotic prophylaxes are preferred to longer-course regimen                                                                                              | 22              |
| Ureteroscopic lithotripsy                                      | Bacteriuria, Postoperative pyuria                                                                                                  | Single dose of oral preoperative antibiotic prophylaxis                                                                                                               | 9, 3            |
| Rhinoplasty                                                    | -                                                                                                                                  | Insufficient evidence to support                                                                                                                                      | -               |
| Stented distal hypospadias repair                              | -                                                                                                                                  | Insufficient evidence to support                                                                                                                                      | -               |
| Post-midurethral sling placement                               | -                                                                                                                                  | Postoperative use is unnecessary; The benefit of postoperative use is still unknown                                                                                   | -               |
| Endoscopic sinus surgery                                       | -                                                                                                                                  | Insufficient evidence to support                                                                                                                                      | -               |
| Kidney transplant recipients with asymptomatic bacteriuria     | -                                                                                                                                  | Insufficient evidence to support                                                                                                                                      | -               |
| Transurethral resection of bladder tumors                      | -                                                                                                                                  | Insufficient evidence to support                                                                                                                                      | -               |
| <b>Contaminated</b>                                            |                                                                                                                                    |                                                                                                                                                                       |                 |
| Endoscopic resection for colorectal lesions                    | Postoperative adverse events                                                                                                       | Especially for patients with hypertension, large size (>2 cm) and nonpolypoid configuration of the lesion                                                             | 6               |
| Colorectal surgery                                             | Surgical wound infection                                                                                                           | Broad-spectrum antibiotics covering both aerobic and anaerobic bacteria                                                                                               | 4               |
| Transrectal prostate biopsy                                    | Pooled infectious complications                                                                                                    | A full 1-day administration of fluoroquinolones, cephalosporins, aminoglycosides or fosfomycin as alternatives after critically assessment                            | 19              |
| <b>Dirty or infected</b>                                       |                                                                                                                                    |                                                                                                                                                                       |                 |
| Incision and drainage of anorectal abscesses                   | -                                                                                                                                  | Antibiotic prophylaxis following operative drainage for co-morbid, immunosuppressed patients is acceptable                                                            | -               |
| <b>Undefined</b>                                               |                                                                                                                                    |                                                                                                                                                                       |                 |
| Any surgical procedures                                        | -                                                                                                                                  | Postoperative continuation of antibiotic prophylaxis is not recommended                                                                                               | -               |
| <b>Non-surgical invasive procedures</b>                        |                                                                                                                                    |                                                                                                                                                                       |                 |
| Postoperative urinary catheterization                          | Urinary tract infections                                                                                                           | Especially for patients with advanced age or long-term catheterization                                                                                                | 14              |
| Mechanical ventilation                                         | Ventilator-associated pneumonia                                                                                                    | Short-term prophylactic antibiotics is effective                                                                                                                      | 6               |
| Adults undergoing cystoscopy                                   | Symptomatic UTIs                                                                                                                   | Not benefit for systemic UTIs; Moderate and low quality of evidence                                                                                                   | 33              |
| Urodynamic studies                                             | Symptomatic UTIs                                                                                                                   | Antibiotics need to be selected according to the regional and local resistance data; ciprofloxacin, levofloxacin, and amoxicillin-clavulanic acid are effective       | 12              |
| Shock wave lithotripsy in patients with sterile urine          | -                                                                                                                                  | Insufficient evidence to support                                                                                                                                      | -               |
| External ventricular drain (EVD) placement                     | -                                                                                                                                  | Antimicrobial-coated EVD catheters may be effective, while systemic antibiotics are not recommended                                                                   | -               |
| Elective endoscopic retrograde cholangiopancreatography (ERCP) | -                                                                                                                                  | Insufficient evidence to support                                                                                                                                      | -               |
| Transarterial therapy of hepatocellular carcinoma              | -                                                                                                                                  | A judicious use of antibiotics is recommended especially for those with concurrent biliary tract disease or a history of biliary reconstruction surgery               | -               |
| Hematopoietic stem cell transplantation (HSCT)                 | -                                                                                                                                  | Increased adverse events; No benefit for mortality                                                                                                                    | -               |
| Totally implantable venous access device (TIVAD) placement     | -                                                                                                                                  | Insufficient evidence to support                                                                                                                                      | -               |
| Hysteroscopy                                                   | -                                                                                                                                  | Very low infection rate highlighted after hysteroscopic procedures; The clinical benefit of antibiotic prophylaxis is very limited                                    | -               |
| <b>Non-procedural scenarios</b>                                |                                                                                                                                    |                                                                                                                                                                       |                 |
| Cancer patients received anti-EGFR inhibitors                  | All grade skin rash, Grade 2-4 skin rash                                                                                           | Minocycline should theoretically be preferred over doxycycline; Less toxic doxycycline is preferred in a metastatic setting                                           | -               |
| Chronic obstructive pulmonary disease (COPD)                   | Quality of life, Exacerbation                                                                                                      | Use of macrolide antibiotics prescribed at least three times per week; The benefit may be generalizable only to patients with moderate-severity COPD or advanced age  | 4               |
| Cirrhosis with ascites                                         | Spontaneous bacterial peritonitis (SBP), Mortality                                                                                 | Norfloxacin is a valuable option; Especially for patients with high-risk SBP                                                                                          | 9, 10           |
| Normal vaginal birth                                           | Endometritis                                                                                                                       | A balance between women's needs, childbirth setting and provider's experience is needed                                                                               | 62              |
| Maternal Group B Streptococcal colonization                    | Neonatal all cause infections                                                                                                      | Penicillin was the chief, with ampicillin as an acceptable alternative                                                                                                | 14              |
| Tick bite                                                      | Unfavorable events                                                                                                                 | A single-dose oral doxycycline administration is preferred                                                                                                            | 69              |
| Open globe injury                                              | Endophthalmitis                                                                                                                    | Intracameral/intravitreal administration                                                                                                                              | 15              |
| Coma                                                           | Ventilator-associated pneumonia                                                                                                    | The effect of long-term antibiotics is not clear                                                                                                                      | 4               |
| History of cellulitis                                          | Recurrence of cellulitis                                                                                                           | Penicillin or erythromycin is an alternative option                                                                                                                   | 5               |
| Second or third trimester of pregnancy                         | Puerperal sepsis                                                                                                                   | Lack of evidence for neonatal morbidity and mortality and has substantial bias                                                                                        | 13              |
| Chemotherapy for acute leukemia                                | Febrile neutropenia                                                                                                                | Levofloxacin is effective; No improvement of mortality                                                                                                                | 2               |
| Chest Trauma                                                   | Empyema                                                                                                                            | Use of antibiotics should continue for more than 24 hours                                                                                                             | 16              |
| Gastrointestinal bleeding in cirrhotic patients                | Overall mortality, Bacterial infections                                                                                            | Oral quinolones (norfloxacin 400 mg b.i.d. for 7 days) or intravenous cephalosporins (ceftriaxone 1g/day for 7 days)                                                  | 22, 4           |
| Afebrile neutropenic following chemotherapy                    | All cause mortality                                                                                                                | Quinolones are optimum; Especially for hematologic cancer patients                                                                                                    | 34              |
| Acute stroke                                                   | Poststroke infection                                                                                                               | No benefit for mortality or improvement of prognosis; Early antibiotics therapy for poststroke infections are recommended, whereas antibiotics for prevention are not | 15              |
| ICU stay                                                       | ICU-acquired pneumonia                                                                                                             | Limited evidence; Concerns about development of antibiotic-resistant pathogens                                                                                        | 8               |
| Vesicoureteral reflux                                          | Febrile and symptomatic UTIs                                                                                                       | Decision analysis and cost-effectiveness analysis are needed                                                                                                          | 12              |
| Non-HIV immunocompromise                                       | Pneumocystis pneumonia                                                                                                             | TMP/SMX prophylaxis is highly effective                                                                                                                               | 19              |
| Burn injury                                                    | -                                                                                                                                  | Insufficient evidence to support                                                                                                                                      | -               |
| Open distal phalanx fractures                                  | -                                                                                                                                  | The focus of treatment should be on prompt irrigation and debridement                                                                                                 | -               |
| Basilar skull fracture                                         | -                                                                                                                                  | Insufficient evidence to support                                                                                                                                      | -               |
| Cardiac arrest                                                 | -                                                                                                                                  | Insufficient evidence to support                                                                                                                                      | -               |
| Premature rupture of the membranes (PROM)                      | -                                                                                                                                  | Only effective in women with latency longer than 12 hours                                                                                                             | -               |
| Women at risk of preterm birth                                 | -                                                                                                                                  | Original studies were conducted long ago (before 2006)                                                                                                                | -               |
| Acute necrotizing pancreatitis                                 | -                                                                                                                                  | Insufficient evidence to support                                                                                                                                      | -               |
| Symptomatic or febrile UTIs in children                        | -                                                                                                                                  | Watchful-waiting approach is preferred for first febrile UTIs in infants and young children                                                                           | -               |
| Children at risk of recurrent UTIs                             | -                                                                                                                                  | Long term and low dose antibiotics have very low benefit; Administration for young infants or children with renal abnormalities is preferred                          | -               |
| Newly diagnosed multiple myeloma                               | -                                                                                                                                  | Within the first 3 months following diagnosis; At the threshold of statistical significance                                                                           | -               |
| Peritoneal dialysis                                            | -                                                                                                                                  | Insufficient evidence to support                                                                                                                                      | -               |

NNT=number need to treat; UTIs=urinary tract infections; ERCP= endoscopic retrograde cholangiopancreatography; PTB= preterm birth; ICU=intensive care unit; EGFR=epidermal growth factor receptor; COPD= chronic obstructive pulmonary disease; TMP/SMX=trimethoprim/sulfamethoxazole.
