# Supplementary material for: Is antibiotic prophylaxis generally safe and effective in surgical and nonsurgical scenarios? Evidence from an umbrella review of randomized controlled trials
Source: PubMed Central journal article supplement — Int J Surg. 2023 Nov 27;110(2):1224–33. doi: 10.1097/JS9.0000000000000923 (PMC10871558; doi:10.1097/js9.0000000000000923), 2023-11-27

# Supplementary Figure 3 summary estimates of trim and fill analysis in 21 outcomes with publication biases

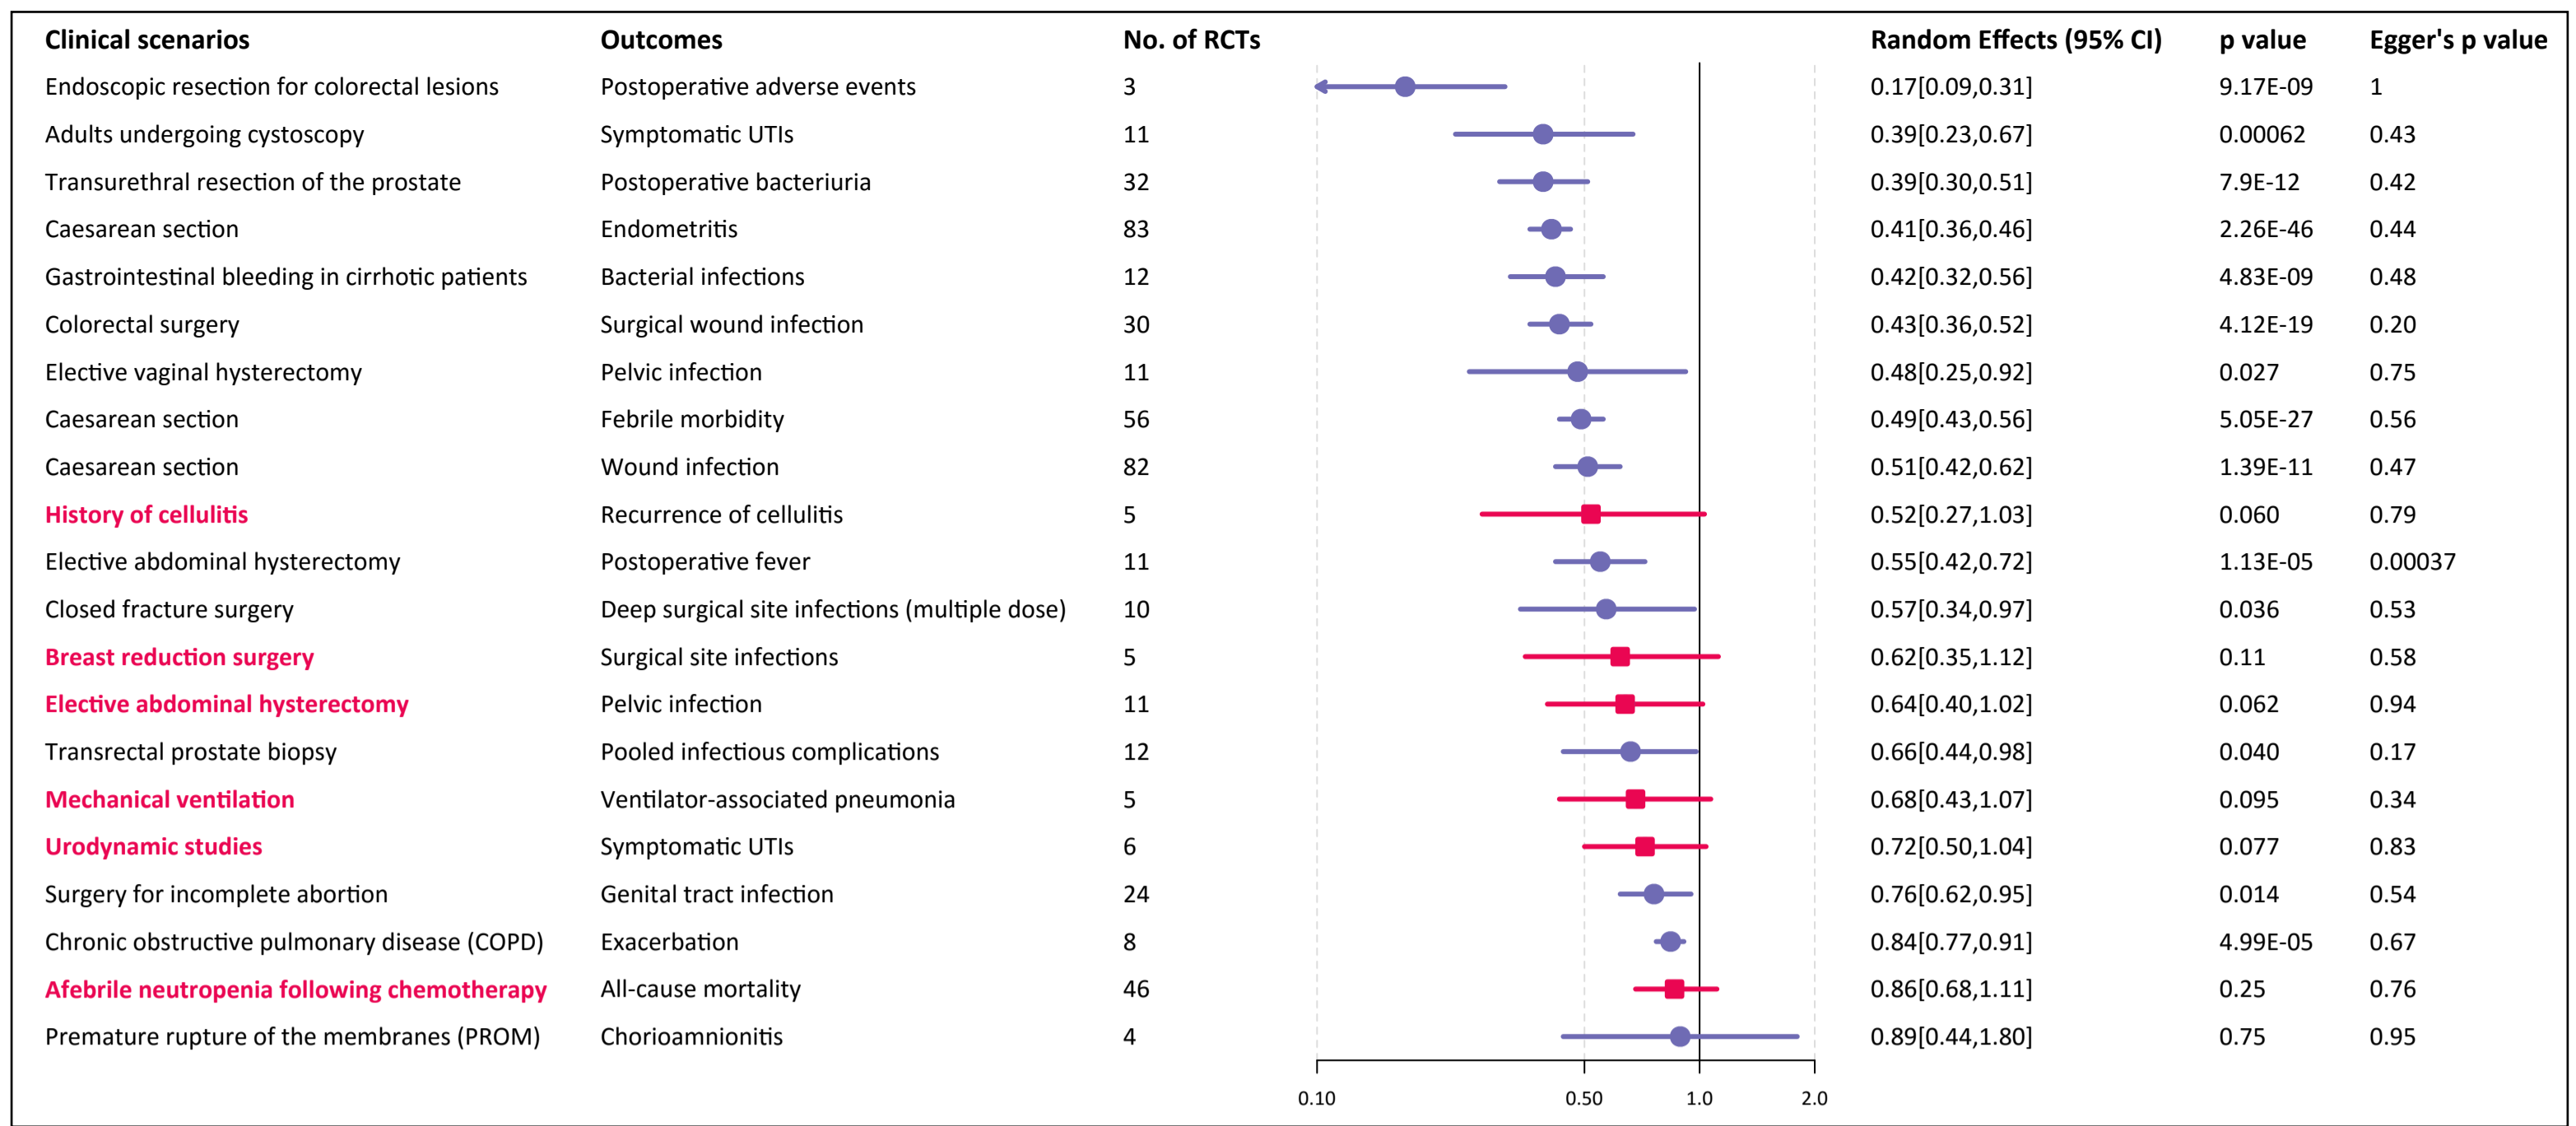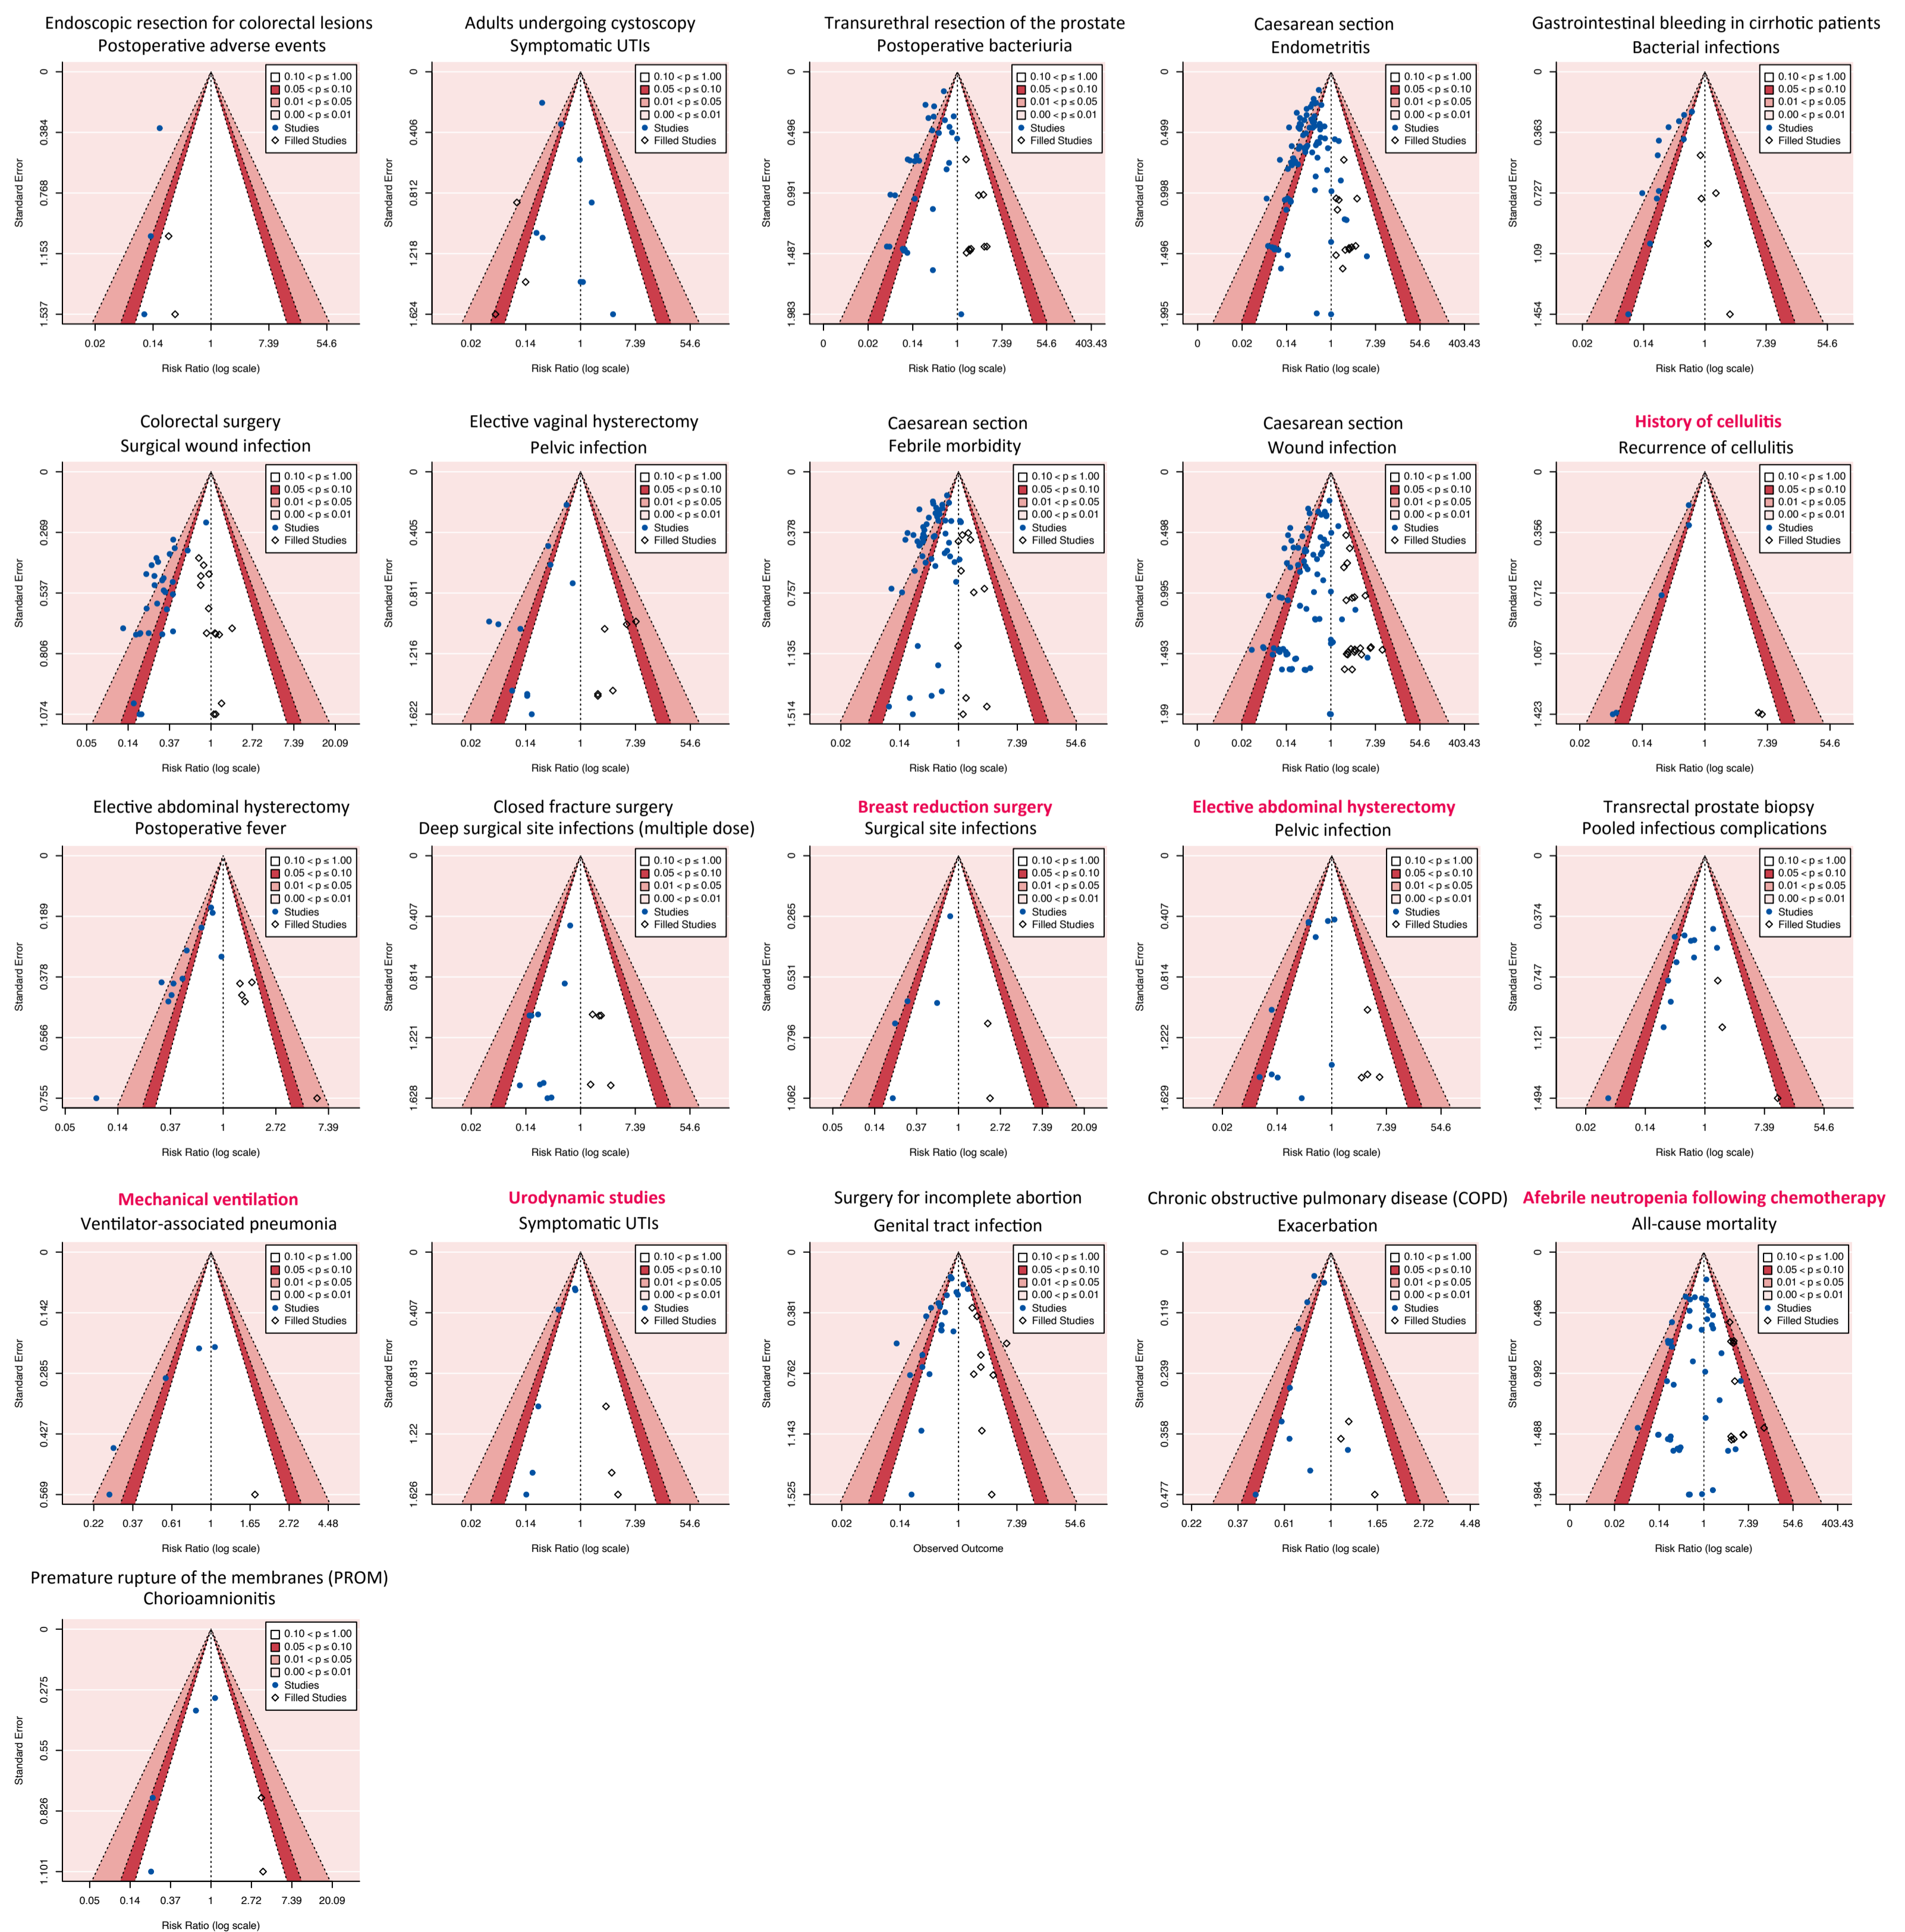

Supplement: js9-110-1224-s015.pdf [file js9-110-1224-s015.pdf]
